# Supplementary material for: Expression and Role of Response Regulating, Biosynthetic and Degrading Genes for Cytokinin Signaling during Clubroot Disease Development
Source: PubMed Central journal article supplement (PMC7312684; doi:10.3390/ijms21113896), 2020-05-29
Supplement: ijms-21-03896-s001.pdf [file ijms-21-03896-s001.pdf]

# Expression and Role of Response Regulating, Biosynthetic and Degrading Genes for Cytokinin Signaling during Clubroot Disease Development

Rawnak Laila, Arif Hasan Khan Robin, Jong-In Park, Gopal Saha, Hoy-Teak Kim, Md. Abdul Kayum and Ill-Sup Nou

## Supplementary Data

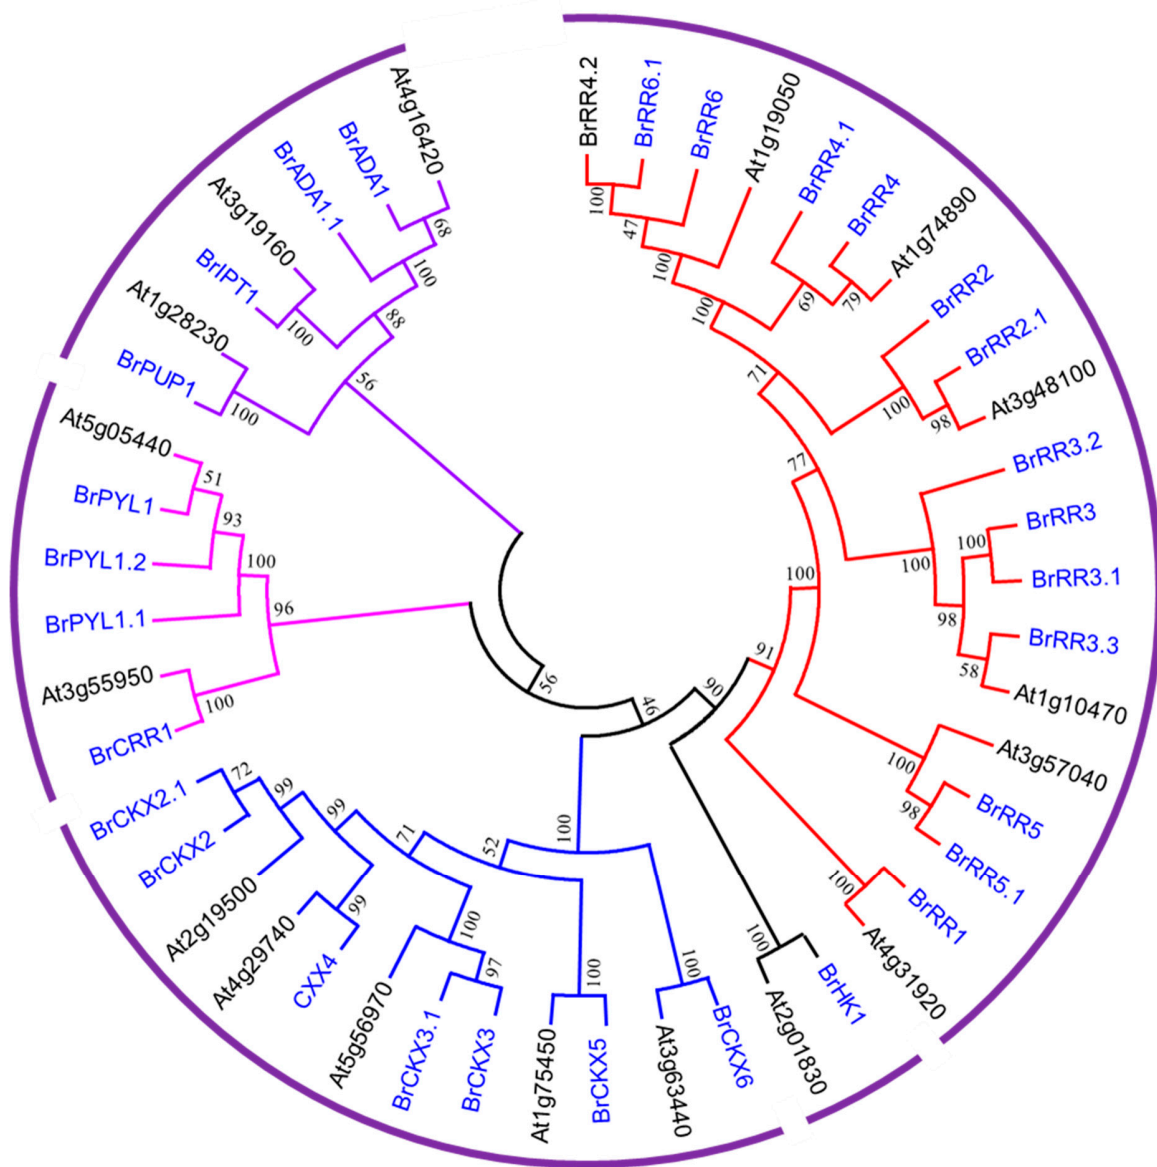

**Figure S1** Phylogenetic tree showing association between cytokinin biosynthesis genes (black) in *Arabidopsis thaliana* and orthologues in *Brassica rapa*. *BrCRR1* is involved in protein phosphorylation and *BrPYL1* is a receptor of ABA.

**Table S1.** Variation in relative expression of cytokinin regulating, synthesizing and degrading genes in root and leaf samples showing non-significant variation between leaves and roots. Each data is the average ( $\pm$ sd) of both inoculated and non-inoculated samples at five different time points. *BrCRR1* is involved in protein phosphorylation and *BrPYL1* is a receptor of ABA.

| Variable       | <i>BrRR2</i>    | <i>BrRR4</i>   | <i>BrADA1</i>   | <i>BrPYL1</i>  | <i>BrCRR1</i>  | <i>BrCKX2</i>  | <i>BrCKX3</i>  | <i>BrCKX5</i>  |
|----------------|-----------------|----------------|-----------------|----------------|----------------|----------------|----------------|----------------|
| Leaf           | 1.02 $\pm$ 1.4  | 1.94 $\pm$ 1.5 | 0.86 $\pm$ 0.5  | 6.33 $\pm$ 3.4 | 0.61 $\pm$ 1.1 | 4.85 $\pm$ 5.6 | 7.65 $\pm$ 5.8 | 6.53 $\pm$ 5.9 |
| Root           | 0.75 $\pm$ 0.68 | 1.21 $\pm$ 1.4 | 0.89 $\pm$ 0.43 | 11.7 $\pm$ 6.4 | 0.19 $\pm$ 0.2 | 3.14 $\pm$ 2.4 | 10.4 $\pm$ 6.9 | 4.35 $\pm$ 3.3 |
| <i>P</i> value | 0.36            | 0.06           | 0.76            | 0.07           | 0.08           | 0.14           | 0.10           | 0.09           |
